# Supplementary material for: Evaluation of Non-Invasive Methods for (R)-[11C]PK11195 PET Image Quantification in Multiple Sclerosis
Source: MDPI journal article supplement (doi:10.3390/jimaging10020039), 2024-01-31
Supplement: s1 [file s1]

## Supplementary material of “Evaluation of non-invasive methods for (R)-[<sup>11</sup>C]PK11195 PET images quantification in multiple sclerosis”

(R)-[<sup>11</sup>C]PK11195 kinetics in SVCA4-derived pseudo reference region  
assessed by the 2T4k<sub>VB</sub> model using AIF

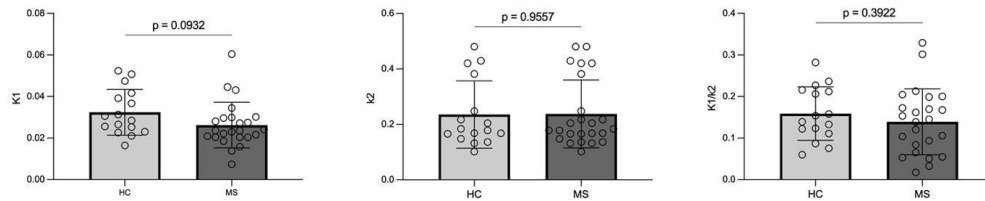

Figure S1. (R)-[<sup>11</sup>C]PK11195 kinetics in SVCA4-derived pseudo reference region assessed by the 2T4k<sub>VB</sub> model using AIF. Light gray boxes represent the HC group while dark gray boxes represent the MS group.

(R)-[<sup>11</sup>C]PK11195- $V_T$  in SVCA4-derived pseudo reference regions  
measured with Logan Plot using AIF and IDIF

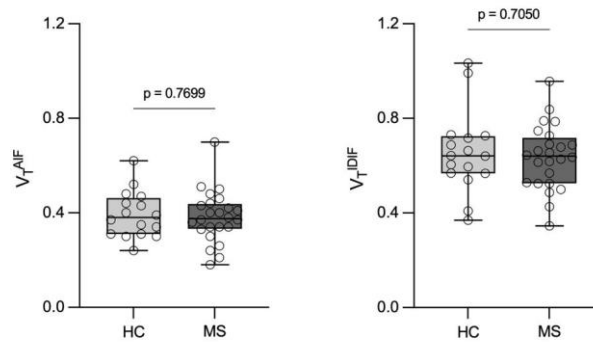

Figure S2. (R)-[<sup>11</sup>C]PK11195- $V_T$  in SVCA4-derived pseudo reference regions measured with the Logan Plot using AIF and IDIF. Light gray boxes represent the HC group while dark gray boxes represent the MS group.

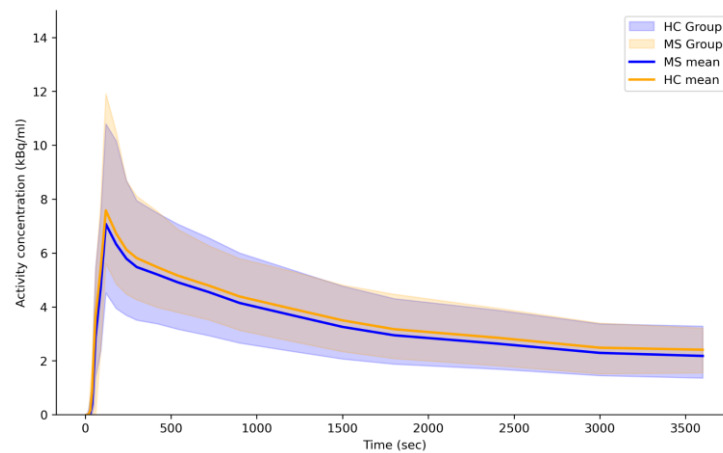

Figure S3. (R)-[<sup>11</sup>C]PK11195 time-activity curves in SVCA4-derived pseudo reference regions in both HC and MS groups.

Table S1. Descriptive statistics of DVR<sup>AIF</sup> values separated by sex in healthy controls.

|                          | Healthy controls |         |              |         |                 |         |         |         |          |         |          |         |            |         |           |         |
|--------------------------|------------------|---------|--------------|---------|-----------------|---------|---------|---------|----------|---------|----------|---------|------------|---------|-----------|---------|
|                          | Gray matter      |         | White matter |         | Caudate nucleus |         | Putamen |         | Pallidum |         | Thalamus |         | Cerebellum |         | Brainstem |         |
|                          | M                | F       | M            | F       | M               | F       | M       | F       | M        | F       | M        | F       | M          | F       | M         | F       |
| Number                   | 5                | 11      | 5            | 11      | 5               | 11      | 5       | 11      | 5        | 11      | 5        | 11      | 5          | 11      | 5         | 11      |
| Minimum                  | 1.05             | 1.05    | 1.04         | 1.07    | 0.82            | 0.77    | 1.02    | 0.99    | 1.03     | 0.93    | 1.11     | 1.04    | 0.97       | 0.94    | 1.05      | 1.12    |
| Maximum                  | 1.17             | 1.21    | 1.25         | 1.3     | 0.94            | 1.16    | 1.21    | 1.25    | 1.22     | 1.24    | 1.28     | 1.24    | 1.08       | 1.14    | 1.28      | 1.35    |
| Range                    | 0.12             | 0.16    | 0.21         | 0.23    | 0.12            | 0.39    | 0.19    | 0.26    | 0.19     | 0.31    | 0.17     | 0.2     | 0.11       | 0.2     | 0.23      | 0.23    |
| Mean                     | 1.092            | 1.105   | 1.106        | 1.147   | 0.884           | 0.9082  | 1.094   | 1.12    | 1.13     | 1.115   | 1.166    | 1.147   | 1.032      | 1.026   | 1.164     | 1.191   |
| Std. Deviation           | 0.04764          | 0.04435 | 0.08792      | 0.06544 | 0.04393         | 0.1169  | 0.07301 | 0.08025 | 0.08832  | 0.08892 | 0.06731  | 0.06198 | 0.03962    | 0.05353 | 0.08735   | 0.06188 |
| Std. Error of Mean       | 0.02131          | 0.01337 | 0.03932      | 0.01973 | 0.01965         | 0.03526 | 0.03265 | 0.0242  | 0.0395   | 0.02681 | 0.0301   | 0.01869 | 0.01772    | 0.01614 | 0.03906   | 0.01866 |
| Coefficient of variation | 4.363%           | 4.012%  | 7.949%       | 5.704%  | 4.970%          | 12.88%  | 6.673%  | 7.165%  | 7.816%   | 7.978%  | 5.772%   | 5.403%  | 3.839%     | 5.215%  | 7.504%    | 5.196%  |
| p-value                  | 0.609            |         | 0.384        |         | 0.559           |         | 0.539   |         | 0.755    |         | 0.613    |         | 0.819      |         | 0.622     |         |

Table S2. Descriptive statistics of DVR<sup>AIF</sup> values separated by sex in MS patients.

|                          | MS patients |         |              |         |                 |         |         |         |          |         |          |         |            |         |           |         |
|--------------------------|-------------|---------|--------------|---------|-----------------|---------|---------|---------|----------|---------|----------|---------|------------|---------|-----------|---------|
|                          | Gray matter |         | White matter |         | Caudate nucleus |         | Putamen |         | Pallidum |         | Thalamus |         | Cerebellum |         | Brainstem |         |
|                          | M           | F       | M            | F       | M               | F       | M       | F       | M        | F       | M        | F       | M          | F       | M         | F       |
| Number                   | 8           | 16      | 8            | 16      | 8               | 16      | 8       | 16      | 8        | 16      | 8        | 16      | 8          | 16      | 8         | 16      |
| Minimum                  | 1.03        | 1.06    | 1.1          | 1.01    | 0.7             | 0.81    | 1.08    | 1.06    | 1.05     | 1.02    | 1.05     | 1.12    | 0.98       | 0.96    | 1.07      | 1.11    |
| Maximum                  | 1.2         | 1.23    | 1.3          | 1.32    | 1.11            | 1.13    | 1.42    | 1.38    | 1.41     | 1.41    | 1.33     | 1.43    | 1.14       | 1.18    | 1.41      | 1.43    |
| Range                    | 0.17        | 0.17    | 0.2          | 0.31    | 0.41            | 0.32    | 0.34    | 0.32    | 0.36     | 0.39    | 0.28     | 0.31    | 0.16       | 0.22    | 0.34      | 0.32    |
| Mean                     | 1.124       | 1.141   | 1.199        | 1.209   | 0.8763          | 0.935   | 1.189   | 1.214   | 1.216    | 1.238   | 1.205    | 1.239   | 1.041      | 1.052   | 1.2       | 1.256   |
| Std. Deviation           | 0.05528     | 0.05097 | 0.06978      | 0.07864 | 0.145           | 0.0994  | 0.121   | 0.1086  | 0.1188   | 0.1091  | 0.1052   | 0.09059 | 0.06198    | 0.05913 | 0.109     | 0.08253 |
| Std. Error of Mean       | 0.01954     | 0.01274 | 0.02467      | 0.01966 | 0.05127         | 0.02485 | 0.04278 | 0.02716 | 0.042    | 0.02727 | 0.03718  | 0.02265 | 0.02191    | 0.01478 | 0.03854   | 0.02063 |
| Coefficient of variation | 4.919%      | 4.466%  | 5.821%       | 6.506%  | 16.55%          | 10.63%  | 10.18%  | 8.945%  | 9.767%   | 8.815%  | 8.726%   | 7.309%  | 5.952%     | 5.621%  | 9.085%    | 6.570%  |
| p-value                  | 0.466       |         | 0.755        |         | 0.326           |         | 0.622   |         | 0.678    |         | 0.445    |         | 0.694      |         | 0.224     |         |
